# Supplementary material for: A Novel Aptamer LL4A Specifically Targets Vemurafenib-Resistant Melanoma through Binding to the CD63 Protein
Source: PubMed Central journal article supplement — Mol Ther Nucleic Acids. 2019 Oct 15;18:727–38. doi: 10.1016/j.omtn.2019.10.005 (PMC6859286; doi:10.1016/j.omtn.2019.10.005), 2019-10-15
Supplement: mmc1.pdf [file mmc1.pdf]

**OMTN, Volume 18**

**Supplemental Information**

**A Novel Aptamer LL4A Specifically  
Targets Vemurafenib-Resistant Melanoma  
through Binding to the CD63 Protein**

**Hui Li, Juan Liu, Xiaojuan Xiao, Shuming Sun, Hui Zhang, Yibin Zhang, Weihua Zhou, Bin Zhang, Mridul Roy, Hong Liu, Mao Ye, Zi Wang, Feng Liu-Smith, and Jing Liu**

**Supplementary Figure S1.**

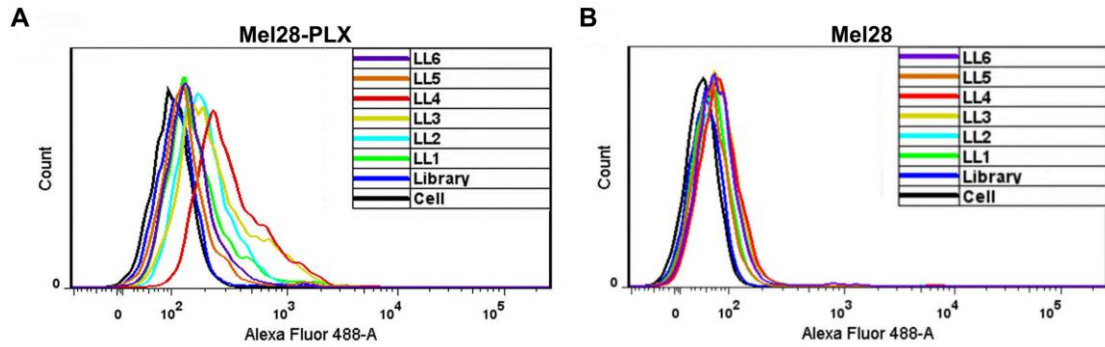

**Supplementary Figure S1. Binding assays of selected aptamers with Mel28-PLX and Mel28 cells.** Flow cytometry assays for the binding capacity of LL1-6 and ssDNA library with Mel28-PLX (A) and Mel28 cells (B).

**Supplementary Figure S2.**

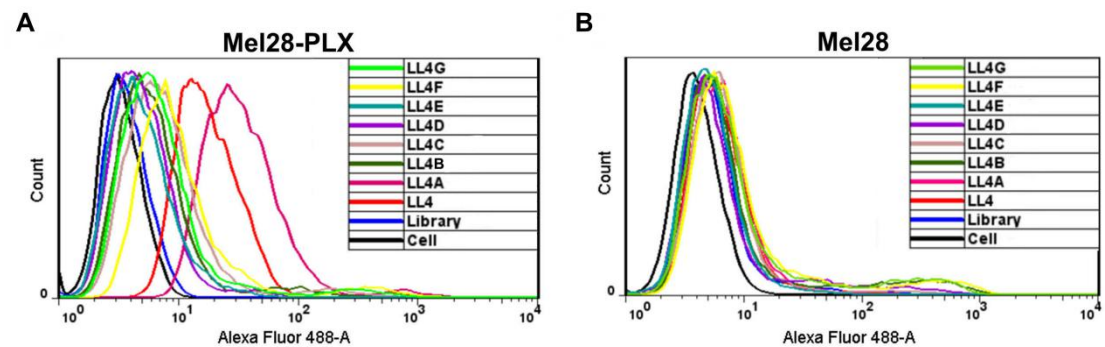

**Supplementary Figure S2. Binding assays of different truncated versions of aptamer LL4 with Mel28-PLX and Mel28 cells.** Flow cytometry assays for the binding capacity of seven kinds of truncated versions of LL4 (LL4A-G) with Mel28-PLX (A) and Mel28 cells (B).

### Supplementary Figure S3.

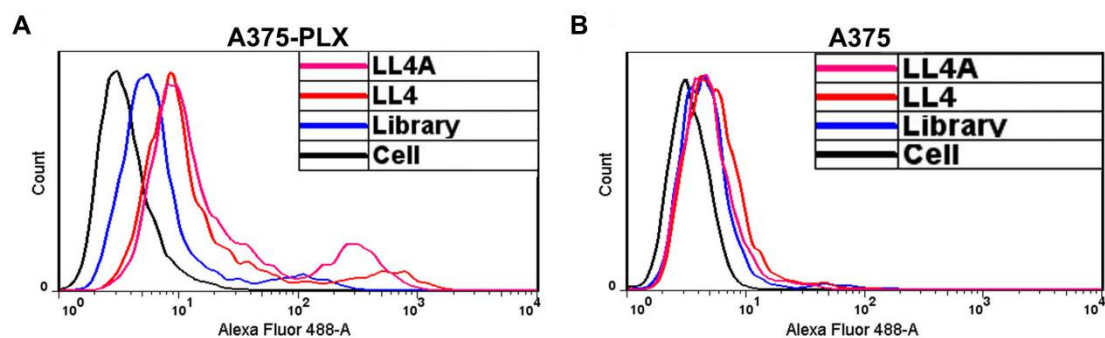

**Supplementary Figure S3. Binding assays of selected aptamer LL4 and LL4A with A375-PLX and A375 cells.** Flow cytometry assays for the binding capacity of LL4 and LL4A with A375-PLX (A) and A375 cells (B).

### Supplementary Figure S4.

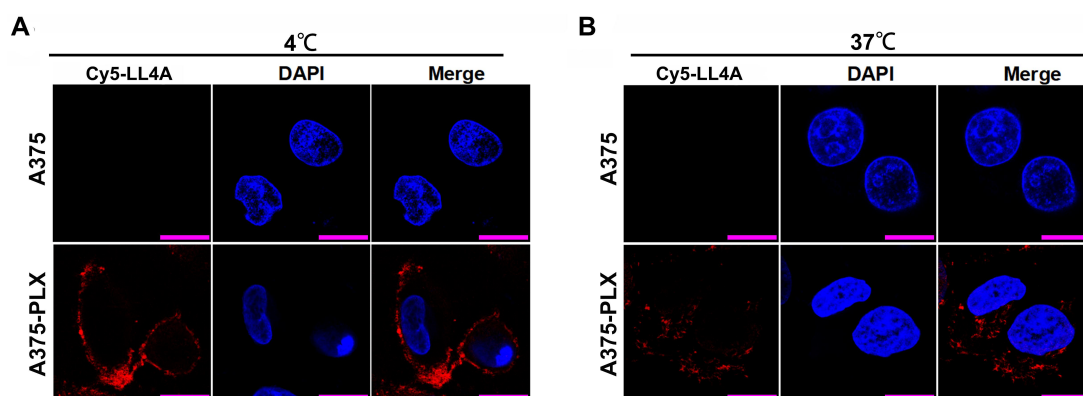

**Supplementary Figure S4. Characterization of LL4A.** (A) The binding site of Cy5-labeled aptamer LL4A to A375 and A375-PLX cells at 4 °C was investigated by confocal microscopy imaging, bar=25  $\mu$ m. (B) The internalization of Cy5-labeled aptamer LL4A into A375-PLX cells at 37 °C was investigated by confocal microscopy imaging, bar=25  $\mu$ m.

Supplementary Figure S5.

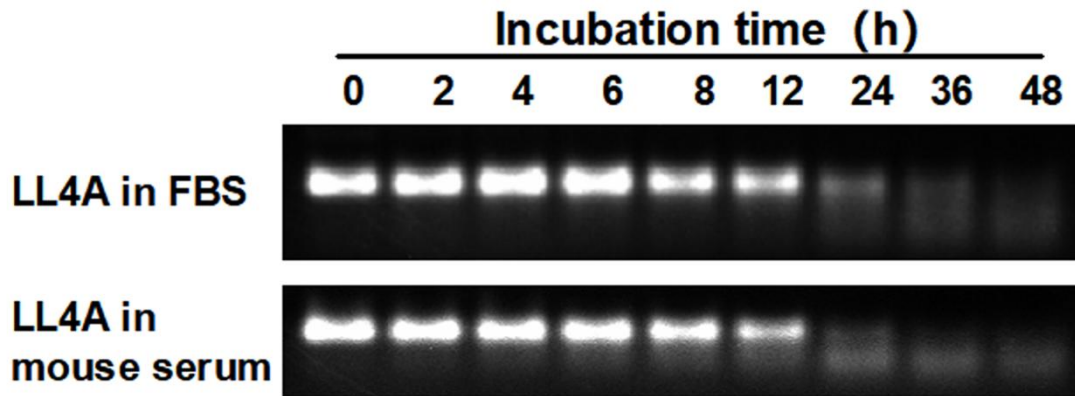

Supplementary Figure S5. The serum stability of LL4A in FBS and mouse serum. Aptamer LL4A was incubated in MEM with 10% FBS or mouse serum, and its biostability was evaluated by gel electrophoresis of the residual products at the indicated time points.

Supplementary Figure S6. LC-MS/MS QSTAR analysis for CD63.

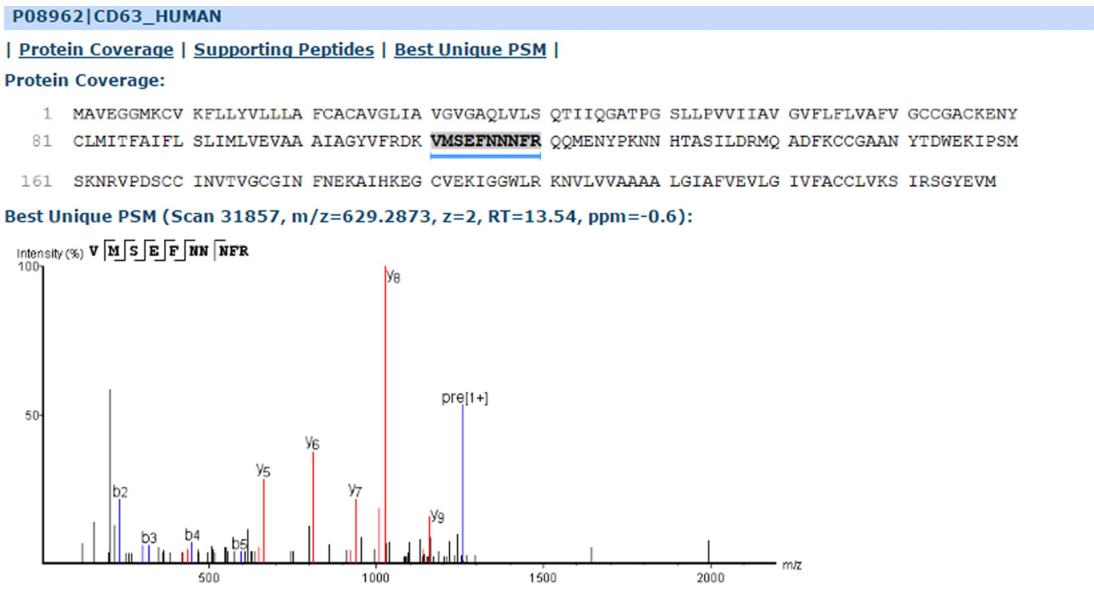

**Supplementary Figure S7.**

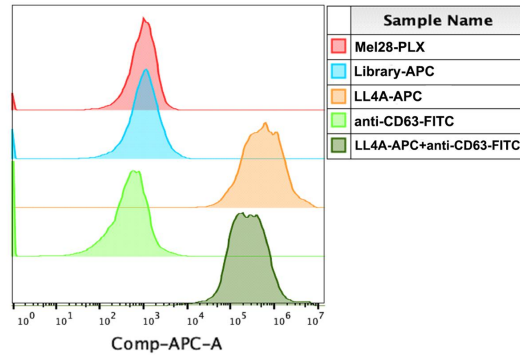

**Supplementary Figure S7. Competition binding was analyzed by flow cytometry. Mel28-PLX cells were Cy5-labeled LL4A and co-incubated with FITC-labeled anti-CD63 antibody and the competition binding was analyzed by flow cytometry.**

**Supplementary Figure S8.**

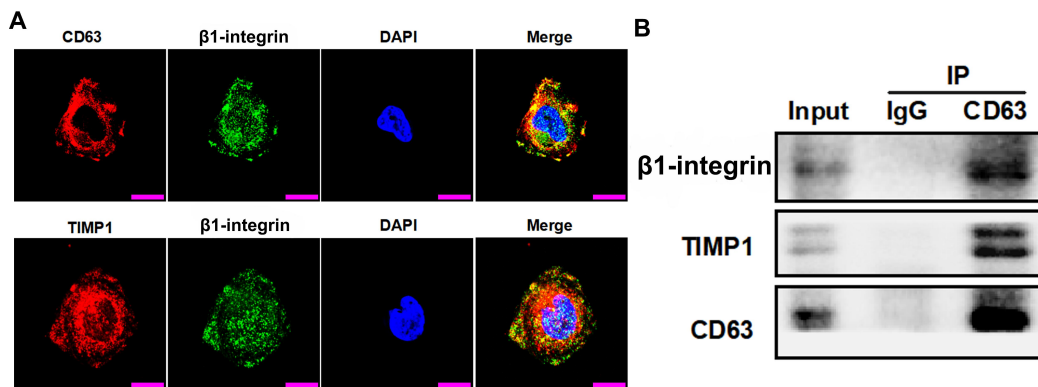

**Supplementary Figure S8. The TIMP1/CD63/ $\beta$ 1-integrin supramolecular complex in Mel28-PLX cells. (A) The co-localization of  $\beta$ 1-integrin with CD63 or TIMP1 in Mel28-PLX cells was examined by confocal microscopy imaging, bar=25  $\mu$ m. (B) Whole-cell lysates from Mel28-PLX cells were subjected to co-immunoprecipitation with a control IgG or an anti-CD63 antibody. The immunoprecipitates (TIMP1 and  $\beta$ 1-integrin) were detected by western blotting.**

**Supplementary Table S1. The biological evolutionary tree analysis data of the candidate aptamers from high-throughput sequencing.**

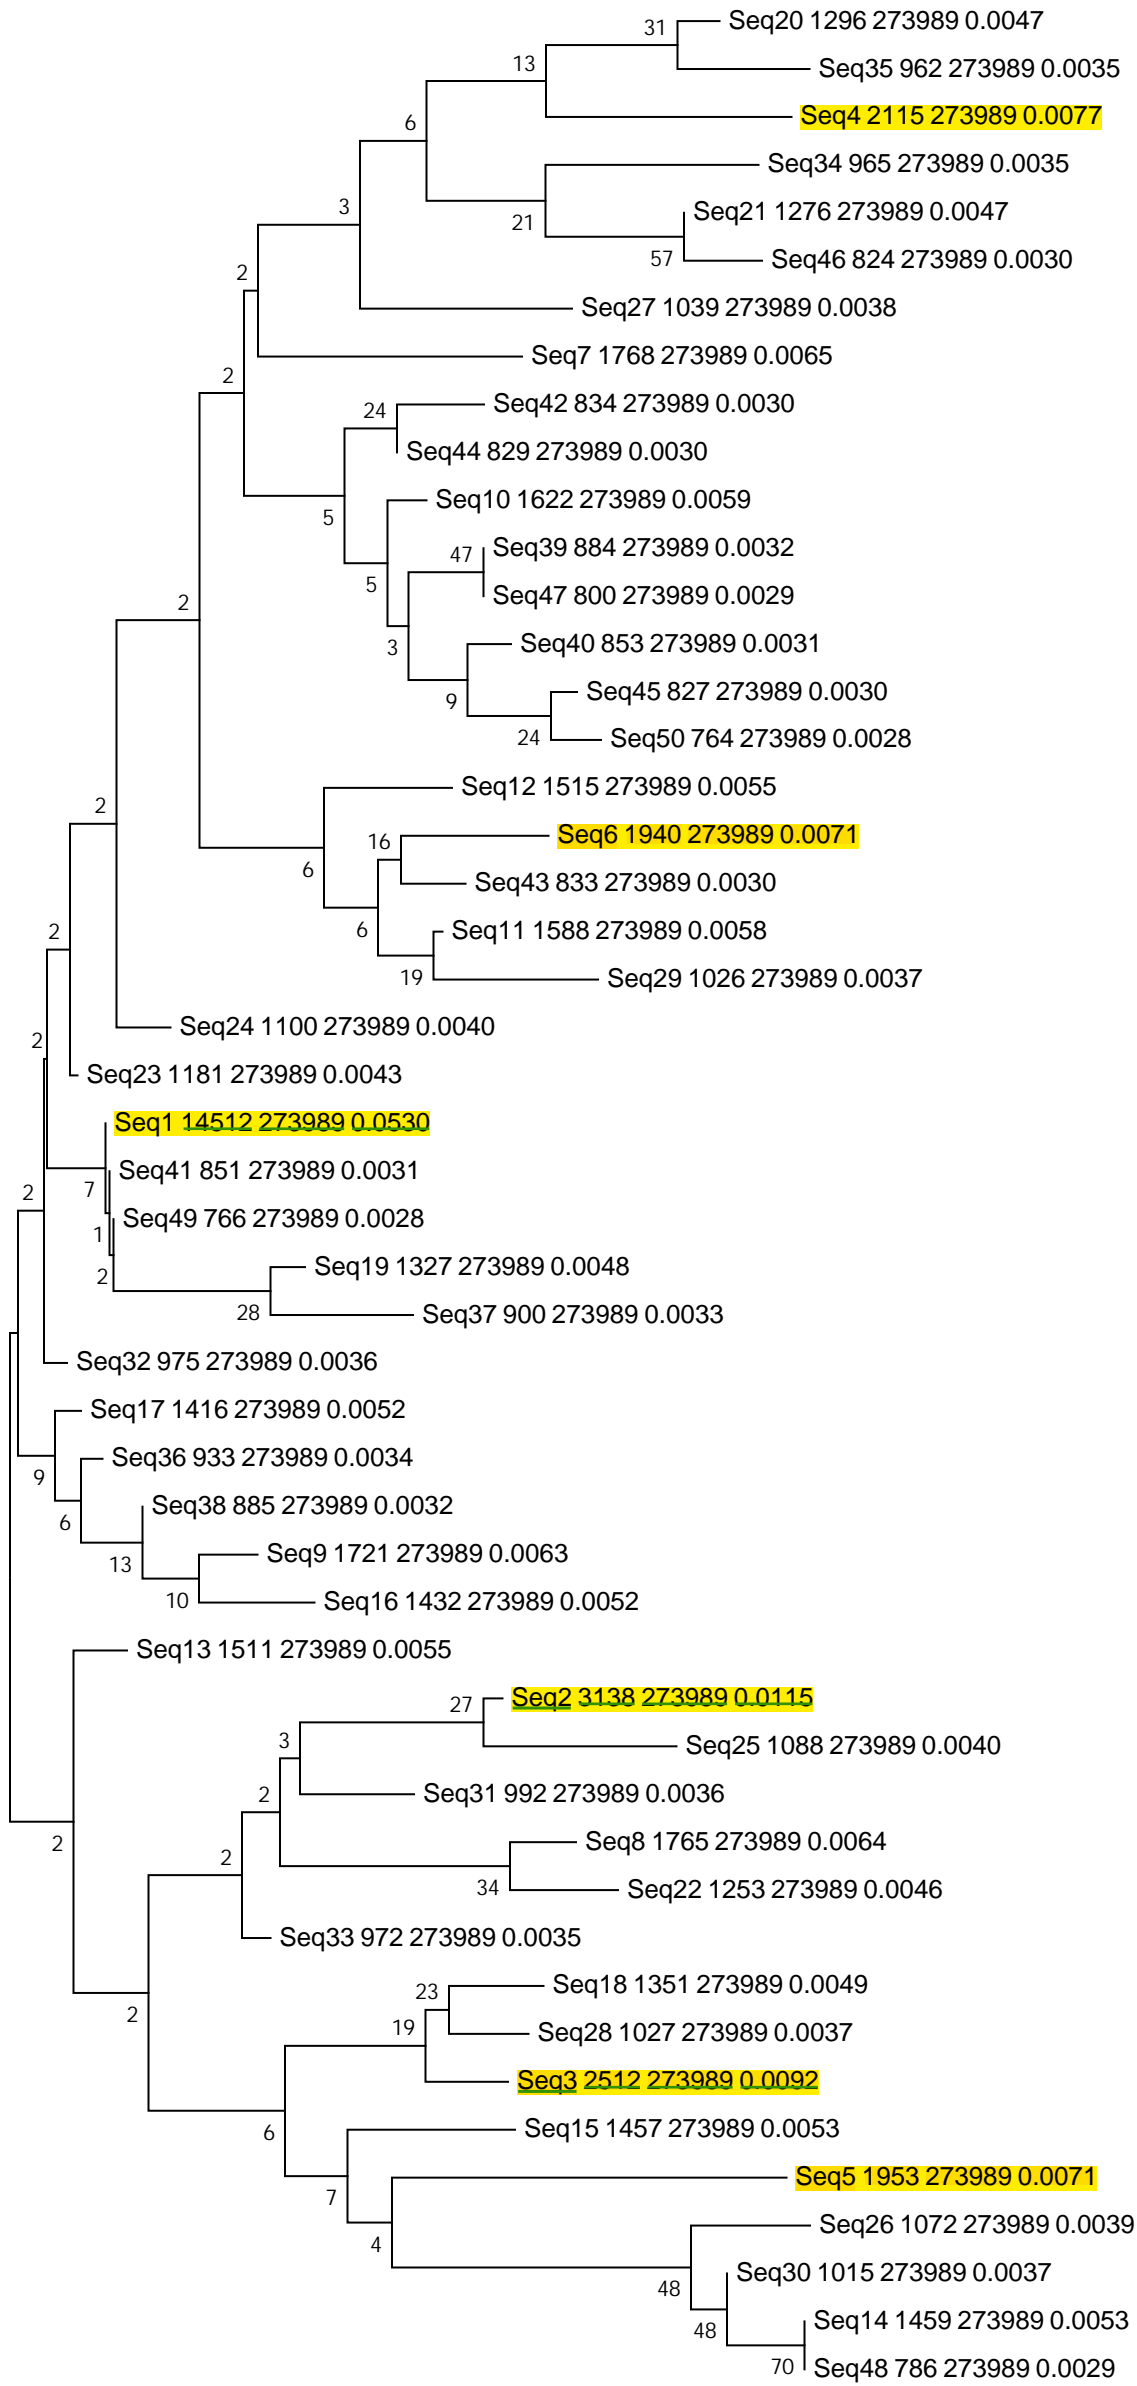

0.2

**Supplementary Table S2. The list of six representative ssDNA sequences**

| Name | Sequences (5' → 3')                                                                  |
|------|--------------------------------------------------------------------------------------|
| LL1  | ACCGACCGTGCTGGACTCAGGATTAAGGTGGAACTAGTG<br>TTAATCGTCGATTTTGATTAGACTATGAGCGAGCCTGGCG  |
| LL2  | ACCGACCGTGCTGGACTCAAACCAATGTAGTACATCTACG<br>CTTTGATTGGCAGGACTTGCGACTATGAGCGAGCCTGGCG |
| LL3  | ACCGACCGTGCTGGACTCACGCAGTGGGTAAATTCGCCAG<br>GACTATCAATTCACGGTCGACTATGAGCGAGCCTGGCG   |
| LL4  | ACCGACCGTGCTGGACTCACCTCGACCAGAGCCATTGGGT<br>TTCCTAGGAAATAGGGCCTTTACTATGAGCGAGCCTGGCG |
| LL5  | ACCGACCGTGCTGGACTCACCGGTAGTTATAAAGAGTTGT<br>TTATTTTCCGTGTAATGGTAACTATGAGCGAGCCTGGCG  |
| LL6  | ACCGACCGTGCTGGACTCAGAGCGGAAGTCCGTTTCAGGT<br>GGGGTTTACTGCATAGATACTATGAGCGAGCCTGGCG    |

**Supplementary Table S3. The list of seven kinds of truncated sequences of LL4**

| Name         | Sequences (5' → 3')                                                         |
|--------------|-----------------------------------------------------------------------------|
| LL4A (10-80) | GCTGGACTCACCTCGACCAGAGCCATTGGGTTTCCTAGG<br>AAATAGGGCCTTTACTATGAGCGAGCCTGGCG |
| LL4B (10-65) | GCTGGACTCACCTCGACCAGAGCCATTGGGTTTCCTAGG<br>AAATAGGGCCTTTACTA                |
| LL4C (1-65)  | ACCGACCGTGCTGGACTCACCTCGACCAGAGCCATTGGG<br>TTTCCTAGGAAATAGGGCCTTTACTA       |
| LL4D (10-55) | GCTGGACTCACCTCGACCAGAGCCATTGGGTTTCCTAGG<br>AAATAGG                          |

LL4E (30-55) AGCCATTGGGTTTCCTAGGAAATAGG  
 CCTCGACCAGAGCCATTGGGTTTCCTAGGAAATAGGGCC  
 LL4F (20-80) TTTACTATGAGCGAGCCTGGCG  
 LL4G (30-80) AGCCATTGGGTTTCCTAGGAAATAGGGCCTTTACTATGAG  
 CGAGCCTGGCG

---

**Supplementary Table S4. The list of 20 candidate proteins detected by MS.**

| <b>Accession</b>   | <b>Description</b>                         |
|--------------------|--------------------------------------------|
| P60709 ACTB_HUMAN  | Actin cytoplasmic 1                        |
| P49411 EFTU_HUMAN  | Elongation factor Tu mitochondrial         |
| Q6S8J3 POTEE_HUMAN | POTE ankyrin domain family member E        |
| P08962 CD63_HUMAN  | CD63 antigen                               |
| O15533 TPSN_HUMAN  | Tapasin                                    |
| O60343 TBCD4_HUMAN | TBC1 domain family member 4                |
| P04264 K2C1_HUMAN  | Keratin type II cytoskeletal 1             |
| P07437 TBB5_HUMAN  | Tubulin beta chain                         |
| P02533 K1C14_HUMAN | Keratin type I cytoskeletal 14             |
| O96019 ACL6A_HUMAN | Actin-like protein 6A                      |
| Q14103 HNRPD_HUMAN | Heterogeneous nuclear ribonucleoprotein D0 |
| Q8NFW8 NEUA_HUMAN  | N-acetylneuraminate cytidylyltransferase   |
| P11498 PYC_HUMAN   | Pyruvate carboxylase mitochondrial         |
| P38159 RBMX_HUMAN  | RNA-binding motif protein X chromosome     |



|                    |                                                         |
|--------------------|---------------------------------------------------------|
| P13645 K1C10_HUMAN | Keratin type I cytoskeletal 10                          |
| P68371 TBB4B_HUMAN | Tubulin beta-4B chain                                   |
| Q99536 VAT1_HUMAN  | Synaptic vesicle membrane protein VAT-1 homolog         |
| O15160 RPAC1_HUMAN | DNA-directed RNA polymerases I and III subunit<br>RPAC1 |
| Q86UE4 LYRIC_HUMAN | Protein LYRIC                                           |
| Q9NX62 IMPA3_HUMAN | Inositol monophosphatase 3                              |

---

**Supplementary Table S5. Information of antibodies.**

| <b>Antibody names</b>             | <b>Information</b>                  |
|-----------------------------------|-------------------------------------|
| Anti-CD63                         | sc-365604, Santa Cruz Biotechnology |
| Anti-TIMP1                        | sc-365905, Santa Cruz Biotechnology |
| Anti- $\beta$ 1-integrin (mouse)  | sc-73610, Santa Cruz Biotechnology  |
| Anti- $\beta$ 1-integrin (rabbit) | ab-24693, abcam                     |
| Anti-NF- $\kappa$ B               | sc-8008, Santa Cruz Biotechnology   |
| Anti-IKBA                         | sc-1643, Santa Cruz Biotechnology   |
| Anti-p-IKBA                       | sc-8404, Santa Cruz Biotechnology   |
| Anti-AKT                          | 9272, Cell Signaling Technology     |
| Anti-p-AKT                        | 13038, Cell Signaling Technology    |
| Anti-ERK                          | 4696, Cell Signaling Technology     |
| Anti-p-ERK                        | 4370, Cell Signaling Technology     |
| Anti-GAPDH                        | sc-365062, Santa Cruz Biotechnology |

---

**Supplementary Table S6. The list of primers and oligomers used in this study.**

| Name                        | Sequences (5' → 3')                |
|-----------------------------|------------------------------------|
| CD63 siRNA-1 sequence       | 5-GGATGCAGGCAGATTTTAATT-3 (sense); |
| CD63 siRNA-2 sequence       | 5-GGATTAATTTCAACGAGAATT-3 (sense); |
| RNA duplex control sequence | 5-UUCUCCGAACGUGUCACGUTT-3 (sense)  |
